# Supplementary material
Source: publisher figshare collection journal article supplement (https://tandf.figshare.com/ndownloader/files/12379499)
Supplement: Supplementary file 1 [file 12379499]

**Supplemental online material**

RD cells were more susceptible to SkQ1 and to microtubule-depolymerizing agents than HT1080 that cause mitosis block (Supplemental Figure 1).

**
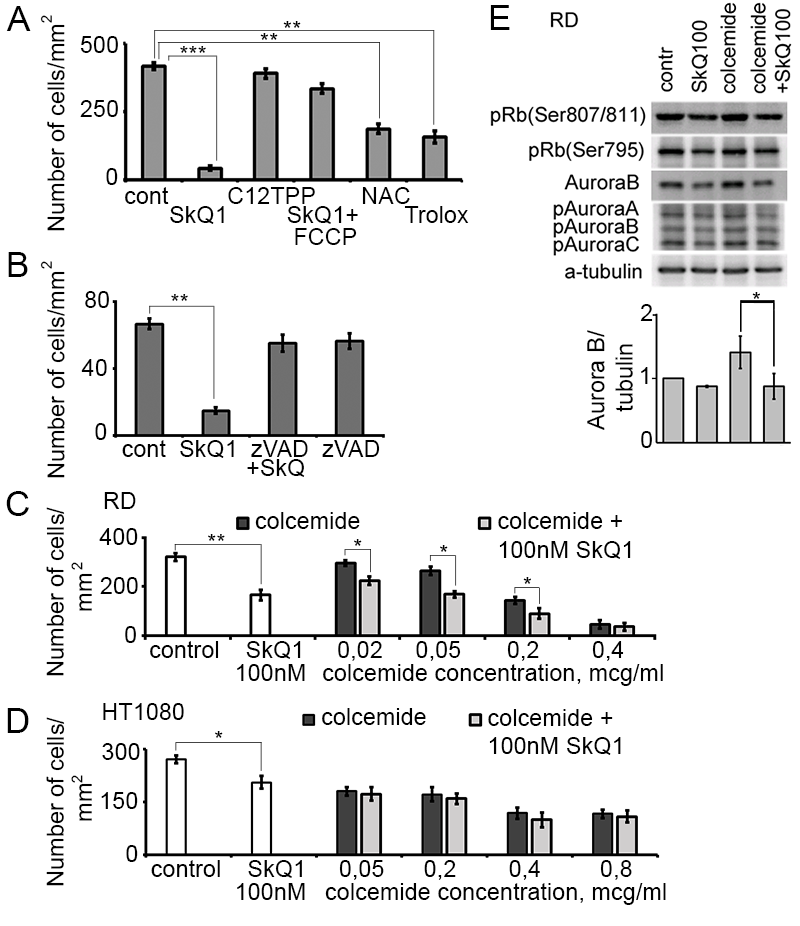
 Supplemental figure 1.** **A.** Antioxidants (SkQ1 20 nM, NAC 1 mM, Trolox 100 µM) but not С12TPP (20 nM) inhibit RD cells proliferation (6 d). **B.** Caspase inhibitor z-VAD-fmk (20 µM) suppresses killing of RD cells (24 h) by SkQ1 (20 nM) observed at low cell density.

**C, D.** Colcemide enhances suppression of RD viability (24 h) induced by SkQ1 (100 nM) but does not affect HT1080 in the presence of SkQ1. **E.** Analysis of Rb and Auroras A,B,C in RD cells treated with colcemide (0.02 µg/ml, 24 h) and SkQ1 (100 nM, 24 h).
